# Supplementary material for: Reduced graphene oxide networks as an effective buffer matrix to improve the electrode performance of porous NiCo2O4 nanoplates for lithium-ion batteries
Source: Royal Society of Chemistry journal article supplement (doi:10.1039/c3ta14624c), 2013-12-16
Supplement: c3ta14624c.pdf [file c3ta14624c.pdf]

## Electronic supplementary information

### **Reduced graphene oxide networks as an effective buffer matrix to improve the electrode performance of porous NiCo<sub>2</sub>O<sub>4</sub> nanoplates for lithium-ion batteries**

Yuejiao Chen,<sup>a,b</sup> Ming Zhuo,<sup>a,b</sup> Jiwei Deng,<sup>a</sup> Zhi Xu,<sup>a,b</sup> Qihong Li<sup>\*a,b</sup> and Taihong Wang<sup>\*a,b</sup>

<sup>a</sup> *Key Laboratory for Micro-Nano Optoelectronic Devices of Ministry of Education, State Key Laboratory for Chemo/Biosensing and Chemometrics, Hunan University, Changsha 410082, P. R. China. Fax: +86 731 88822332; Tel: +86 731 88822332;*

*E-mail: [thwang@iphy.ac.cn](mailto:thwang@iphy.ac.cn); [liqihong2004@hotmail.com](mailto:liqihong2004@hotmail.com)*

<sup>b</sup> *College of Electrical and Information Engineering, Hunan University, Changsha 410082, P. R. China.*

Electronic Supplementary Material (ESI)

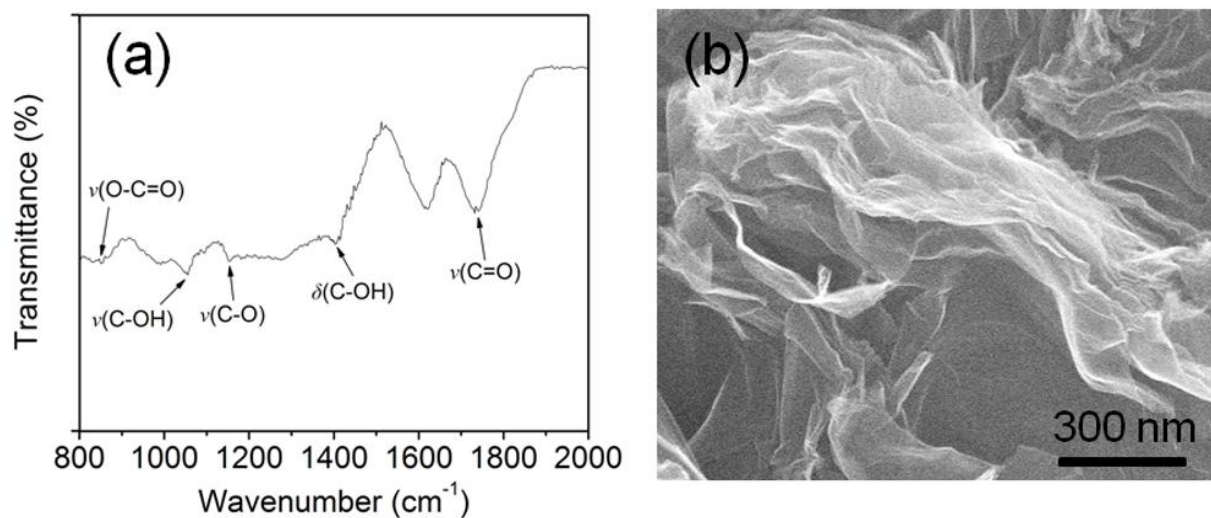

**Figure S1.** (a) FT-IR spectra and (b) SEM image of graphene oxide.

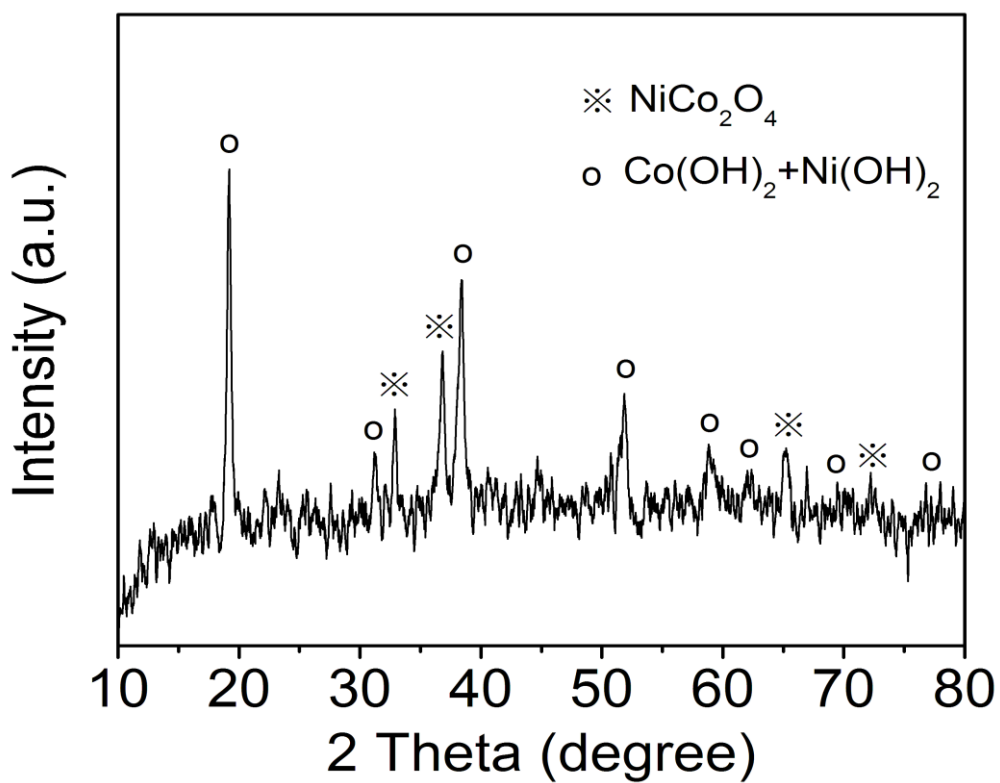

**Figure S2.** XRD profile of the Ni-Co hydroxide-RGO precursor.

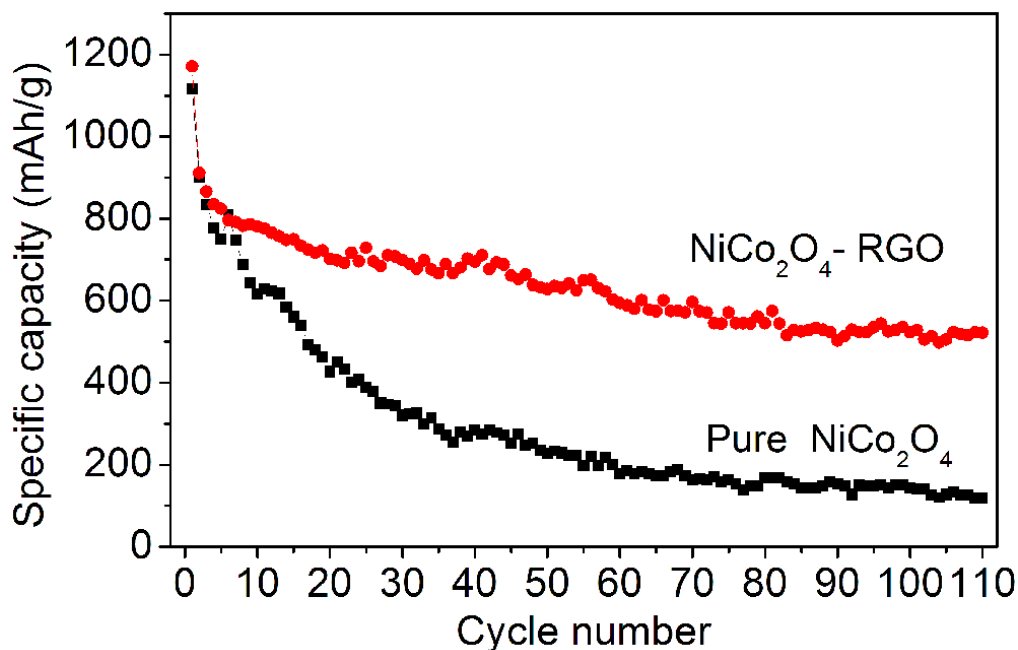

**Figure S3.** The cycling performances of the NiCo<sub>2</sub>O<sub>4</sub>/rGO nanocomposite and pure NiCo<sub>2</sub>O<sub>4</sub> in the voltage window of 0.01-3.00 V at a rate of 200 mA g<sup>-1</sup> for 110 cycles.

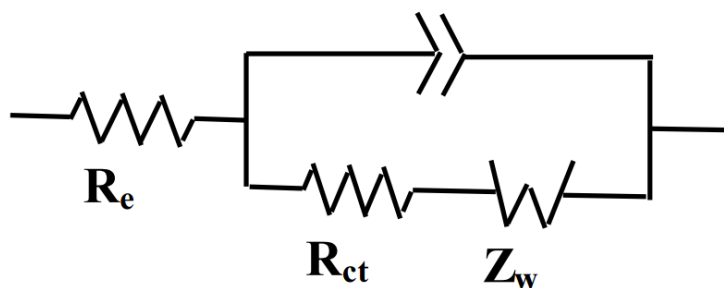

**Figure S4.** Equivalent electrical circuit used to fit the EIS data.  $R_e$  is the electrolyte resistance,  $R_{ct}$  is the charge-transfer resistance,  $Z_w$  is the Warburg impedance related to the diffusion of Li ions into the bulk electrodes. The better wetting of the active material and refrained fragment supporting are responsible for the low  $R_{ct}$  value for NiCo<sub>2</sub>O<sub>4</sub>/RGO.
